# Supplementary material for: Coordinated Information Generation and Mental Flexibility: Large-Scale Network Disruption in Children with Autism
Source: PubMed Central journal article supplement — Cereb Cortex. 2014 Apr 25;25(9):2815–27. doi: 10.1093/cercor/bhu082 (PMC4537433; doi:10.1093/cercor/bhu082), 2014-04-25
Supplement: supp_bhu082_bhu082supp.pdf [file supp_bhu082_bhu082supp.pdf]

Figure S1: **PLS analysis of power spectral density: whole-brain montage.** Together, (A) and (B) represent the dominant latent variable in the data, accounting for the greatest covariance between the study design and neural activity (PSD). (A) The optimal combination (contrast) of groups and conditions, weighted by their contribution to the latent variable. Error bars are estimated by bootstrap resampling. (B) Bootstrap ratios: the optimal combination (spatiotemporal pattern) of sources and frequencies, weighted by the reliability of their contribution to the latent variable. For a given source and frequency, a high-valued positive bootstrap ratio means that the contrast in (A) is reliably expressed (i.e. greater power for the Control group). A high-valued negative bootstrap ratio means that the opposite contrast is reliably expressed (i.e. greater power for the ASD group).

Figure S2: **PLS analysis of multiscale entropy: whole-brain montage.** Together, (A) and (B) represent the dominant latent variable in the data, accounting for the greatest covariance between the study design and neural activity (PSD). (A) The optimal combination (contrast) of groups and conditions, weighted by their contribution to the latent variable. Error bars are estimated by bootstrap resampling. (B) Bootstrap ratios: the optimal combination (spatiotemporal pattern) of sources and time scales, weighted by the reliability of their contribution to the latent variable. For a given source and time scale, a high-valued positive bootstrap ratio means that the contrast in (A) is reliably expressed. A high-valued negative bootstrap ratio means that the opposite contrast is reliably expressed.
